# Supplementary material
Source: PubMed Central journal article supplement (PMC5067122)
Supplement: 10.7899_JCE-15-26.pdf [file 10.7899_JCE-15-26.pdf]

Treatment Plan Formation Questionnaire

I am a final year chiropractic student at IMU? Yes or No (please circle)

Please answer all of the questions below.

|                                                                                                                                                                                            | Strongly Disagree | Disagree | Neutral | Agree | Strongly Agree |
|--------------------------------------------------------------------------------------------------------------------------------------------------------------------------------------------|-------------------|----------|---------|-------|----------------|
| 1. I find clinical guidelines helpful in developing a treatment plan?                                                                                                                      |                   |          |         |       |                |
| 2. I find Cochrane reviews helpful in developing a treatment plan?                                                                                                                         |                   |          |         |       |                |
| 3. I find the electronic databases available through the IMU library website ie/ pubmed, Ebsco or Ovid are not helpful in generating a treatment plan?                                     |                   |          |         |       |                |
| 4. I find textbooks helpful in developing a treatment plan?                                                                                                                                |                   |          |         |       |                |
| 5. I do not find Wikipedia to be helpful in developing a treatment plan?                                                                                                                   |                   |          |         |       |                |
| 6. I find in-class instruction materials helpful in developing a treatment plan?                                                                                                           |                   |          |         |       |                |
|                                                                                                                                                                                            |                   |          |         |       |                |
| 7. I routinely access clinical guidelines when developing a treatment plan?                                                                                                                |                   |          |         |       |                |
| 8. I rarely access Cochrane reviews when developing a treatment plan?                                                                                                                      |                   |          |         |       |                |
| 9. I routinely access electronic databases when developing a treatment plan?                                                                                                               |                   |          |         |       |                |
| 10. I routinely access textbooks when developing a treatment plan?                                                                                                                         |                   |          |         |       |                |
| 11. I routinely access Wikipedia when developing a treatment plan?                                                                                                                         |                   |          |         |       |                |
| 12. I rarely access in-class instructional material when developing a treatment plan?                                                                                                      |                   |          |         |       |                |
| 13. Of the following, which do you find the most useful when developing a treatment plan? (please rank the following in order of importance with 1 being most important and 4 being least) | 1, 2, 3, 4        |          |         |       |                |
| Scientific evidence                                                                                                                                                                        |                   |          |         |       |                |
| Views of my clinician                                                                                                                                                                      |                   |          |         |       |                |
| My previous clinical experience in managing similar cases                                                                                                                                  |                   |          |         |       |                |
| Views and wishes of my patient                                                                                                                                                             |                   |          |         |       |                |
